# Supplementary material for: New AIE-active pyrimidine-based boronfluoride complexes with high solid-state emission and reversible mechanochromism luminescence behavior
Source: Royal Society of Chemistry journal article supplement (doi:10.1039/c6dt00292g), 2016-01-01
Supplement: c6dt00292g1.pdf [file c6dt00292g1.pdf]

## Supporting Information

### New AIE-active Pyrimidine-Based Boronfluoride Complexes with High Solid-State Emission and Reversible Mechanochromism Luminescence Behavior

Fen Qi,<sup>[a]</sup> Jianjian Lin,<sup>[b]</sup> Xiaoqing Wang,<sup>\*[a,b]</sup> Peng Cui,<sup>[c]</sup> Hui Yan,<sup>[a]</sup> Shuwen Gong,<sup>[a]</sup> Chunlin Ma,<sup>\*[a]</sup>  
Zhipeng Liu<sup>\*[a,b]</sup> and Wei Huang<sup>[b]</sup>

<sup>[a]</sup> Institute of Functional Organic Molecules and Materials, School of Chemistry and Chemical Engineering, School of Material Science and Engineering, School of Pharmacy, Liaocheng University, No.1 Hunan Road, Liaocheng, 252000, P.R. China, E-mail: [wangxiaoqing@lcu.edu.cn](mailto:wangxiaoqing@lcu.edu.cn) (X.W.); [machunlin@lcu.edu.cn](mailto:machunlin@lcu.edu.cn) (M.C.).

<sup>[b]</sup> Key Laboratory of Flexible Electronics (KLOFE) & Institute of Advanced Materials (IAM), Jiangsu National Synergetic Innovation Center for Advanced Materials (SICAM), Nanjing Tech University (NanjingTech), 30 South Puzhu Road, Nanjing, 211816, P.R. China. E-mail: [iamzpliu@njtech.edu.cn](mailto:iamzpliu@njtech.edu.cn) (Z.L.).

<sup>[c]</sup> Hefei National Laboratory for Physical Sciences at the Microscale, University of Science and Technology of China, No. 96 Jinzhai Road, Hefei, 230026, P.R. China.

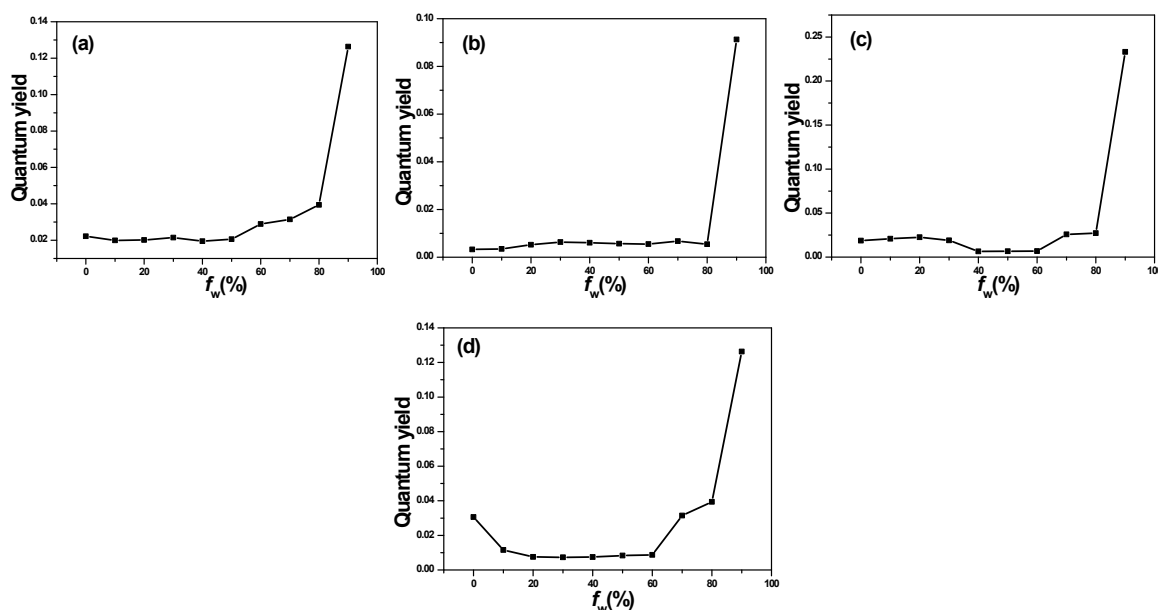

Figure S1. Changes in the quantum yields of compounds PB-1 (a), PB-2 (b), PB-3 (c) and PB-4(d) in water/THF mixtures with varied volumetric fractions of water ( $f_w$ ).

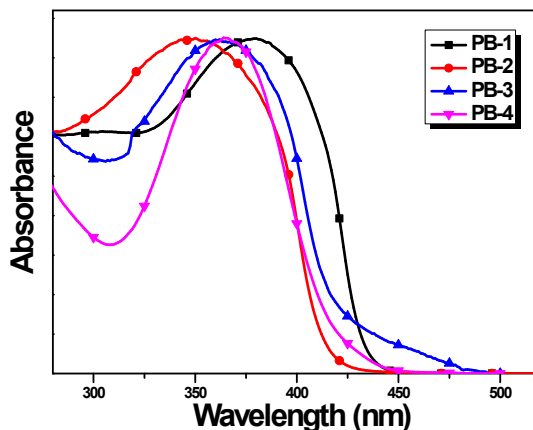

Figure S2. Absorption of PB-1–4 in drop-cast film.

**Table S1.** Calculated excited wavelength ( $\lambda$ ) and oscillator strengths ( $f$ ) and related wave functions.

| Compound | State <sup>[a]</sup><br>J | Energy<br>[eV] | $\lambda$ [nm] | $f^{[b]}$ | Orbitals (coefficient) <sup>[c]</sup>  |
|----------|---------------------------|----------------|----------------|-----------|----------------------------------------|
| PB-1     | S1                        | 3.8136         | 325.11         | 0.5925    | H>L (95%)                              |
|          | S2                        | 4.5915         | 270.00         | 0.0904    | H>L+1 (84%)                            |
| PB-2     | S1                        | 4.0244         | 308.08         | 0.6623    | H>L (95%)                              |
|          | S2                        | 4.6374         | 267.36         | 0.0317    | H-3>L+1 (2%), H>L+1 (88%)              |
| PB-3     | S1                        | 4.1037         | 302.13         | 0.6960    | H>L (95%)                              |
|          | S2                        | 4.8592         | 255.15         | 0.0010    | H-3>L+1 (2%), H-1>L (13%), H>L+1 (76%) |
| PB-4     | S1                        | 3.9711         | 312.21         | 0.9708    | H>L (92%)                              |
|          | S2                        | 4.6787         | 265.00         | 0.0051    | H-9>L (2%), H-1>L (60%), H>L+1 (29%)   |

[a] Excited state; [b] Oscillator strength; [c] MOs involved in the transitions, H = HOMO, L = LUMO.

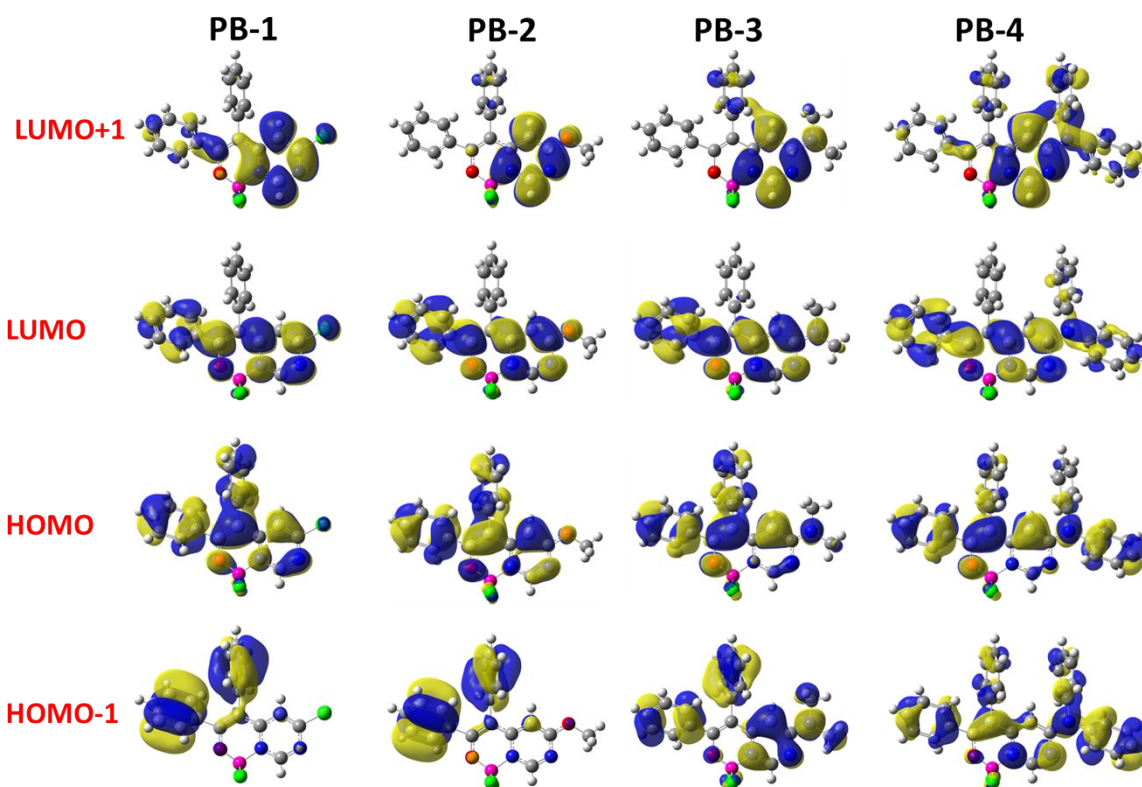

**Figure S3.** Molecular orbital amplitude plots of PB-1–4 calculated by using CAM-B3LYP/6-31+G(d) basis set with G03 program.

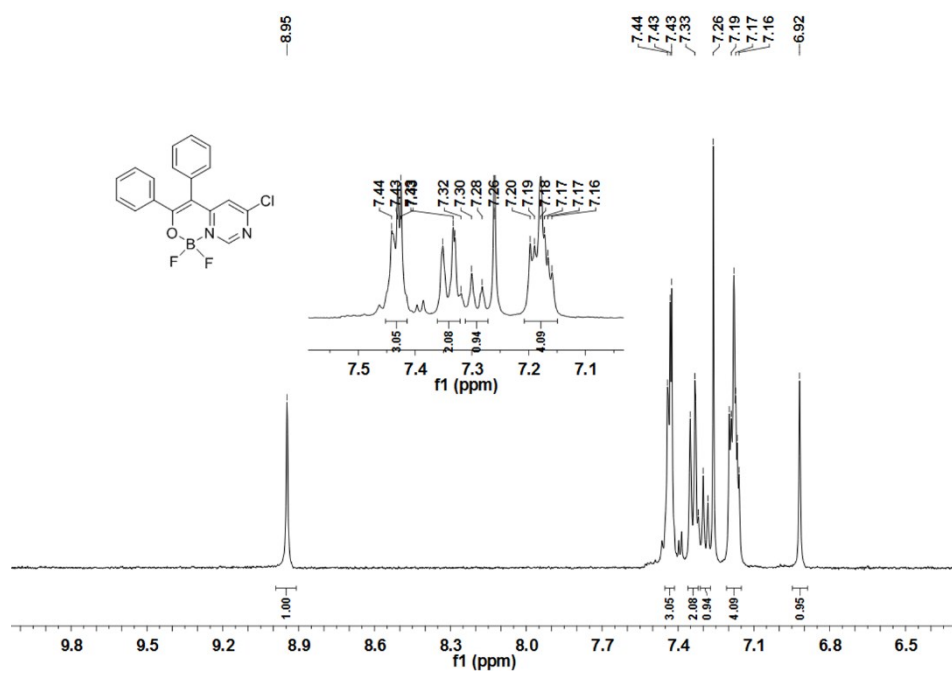

Figure S4. <sup>1</sup>H NMR of PB-1 in CDCl<sub>3</sub>.

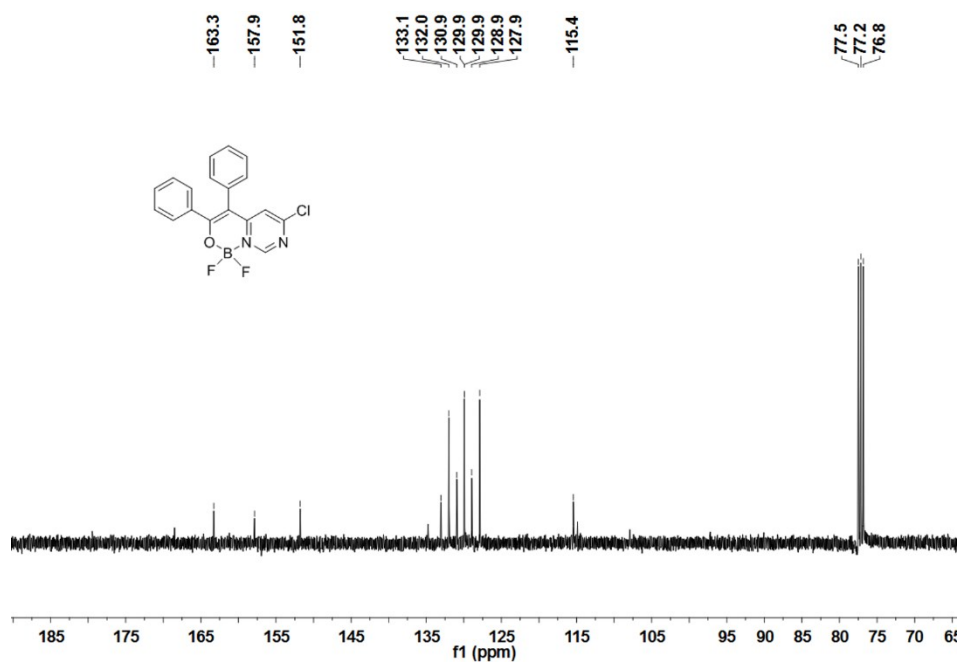

Figure S5. <sup>13</sup>C NMR of PB-1 in CDCl<sub>3</sub>.

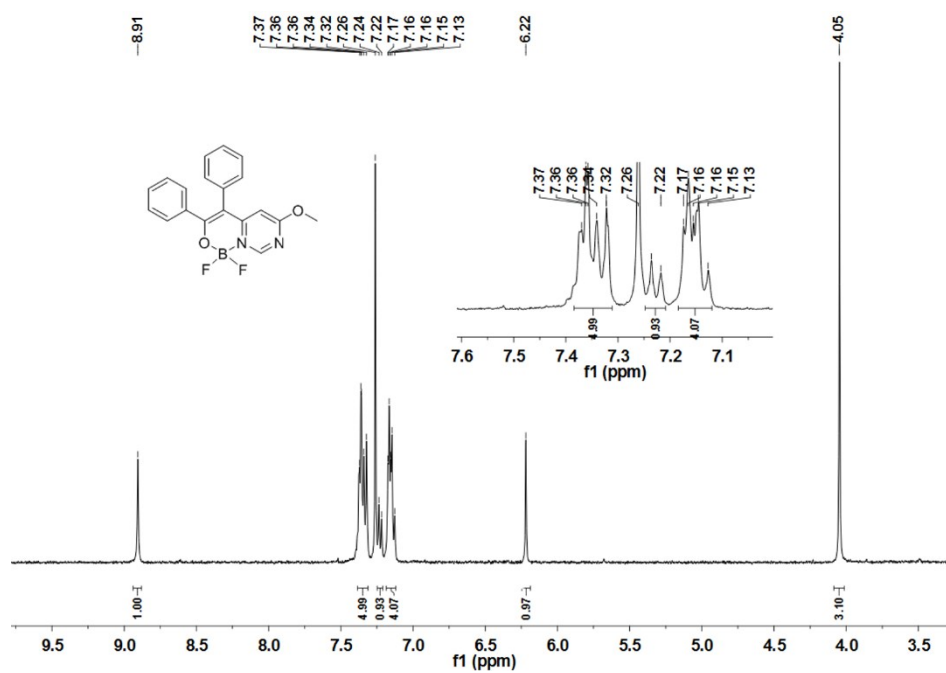Figure S6.  $^1\text{H NMR}$  of PB-2 in  $\text{CDCl}_3$ .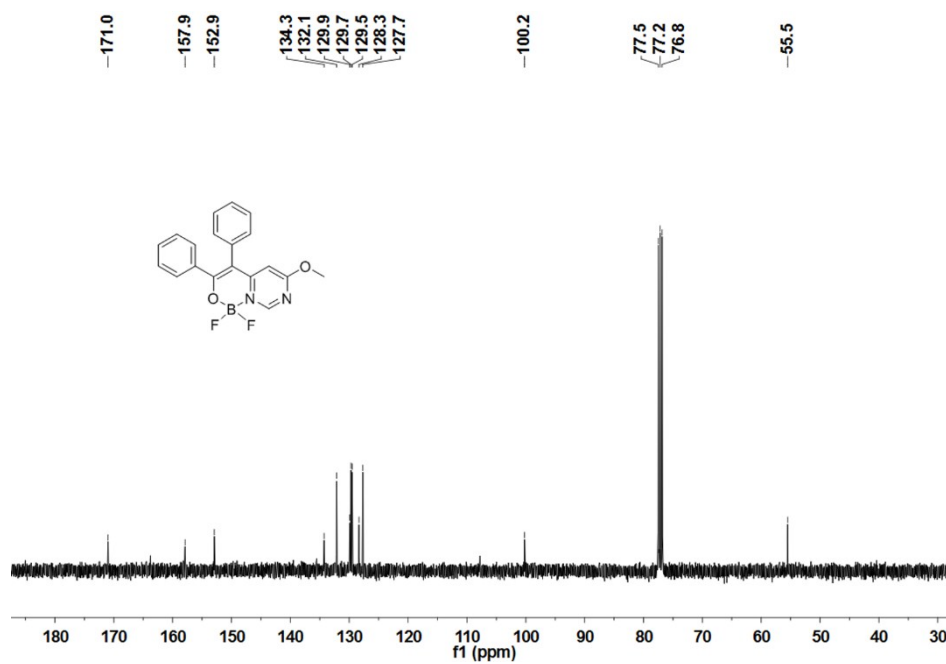Figure S7.  $^{13}\text{C NMR}$  of PB-2 in  $\text{CDCl}_3$ .

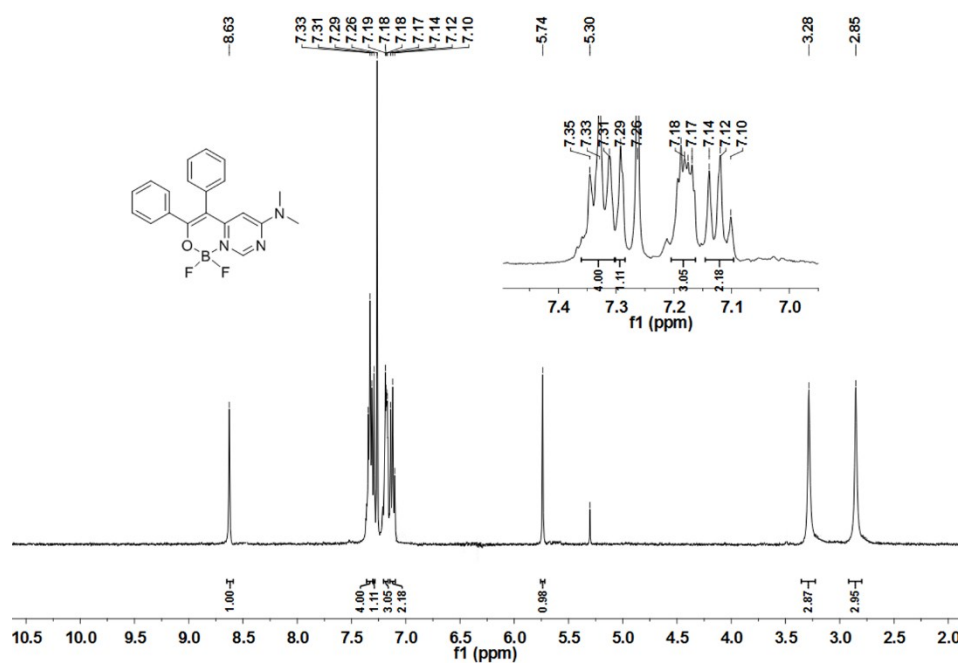Figure S8. <sup>1</sup>H NMR of PB-3 in CDCl<sub>3</sub>.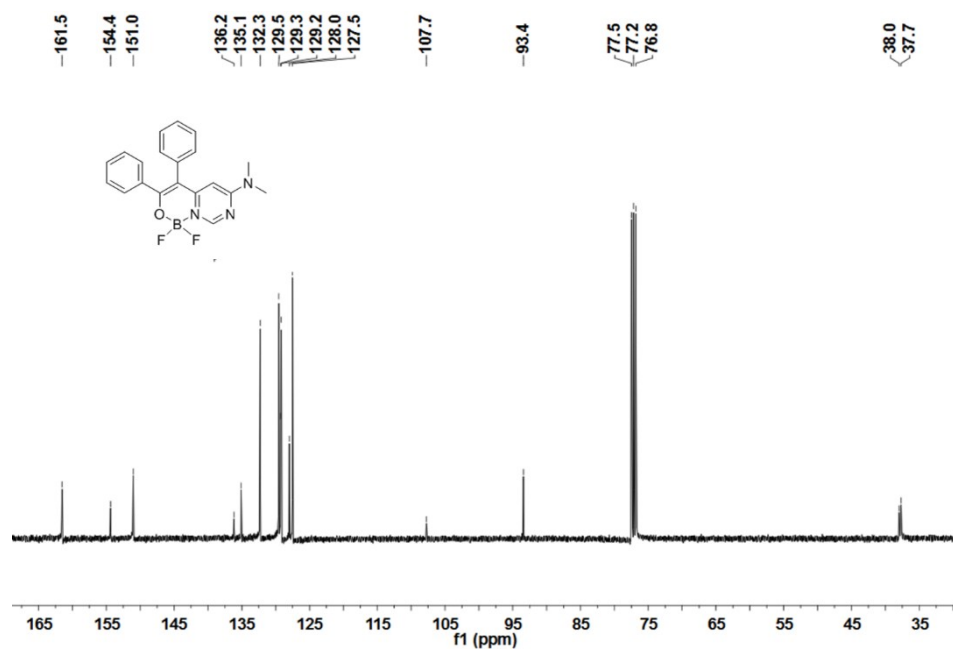Figure S9. <sup>13</sup>C NMR of PB-3 in CDCl<sub>3</sub>.

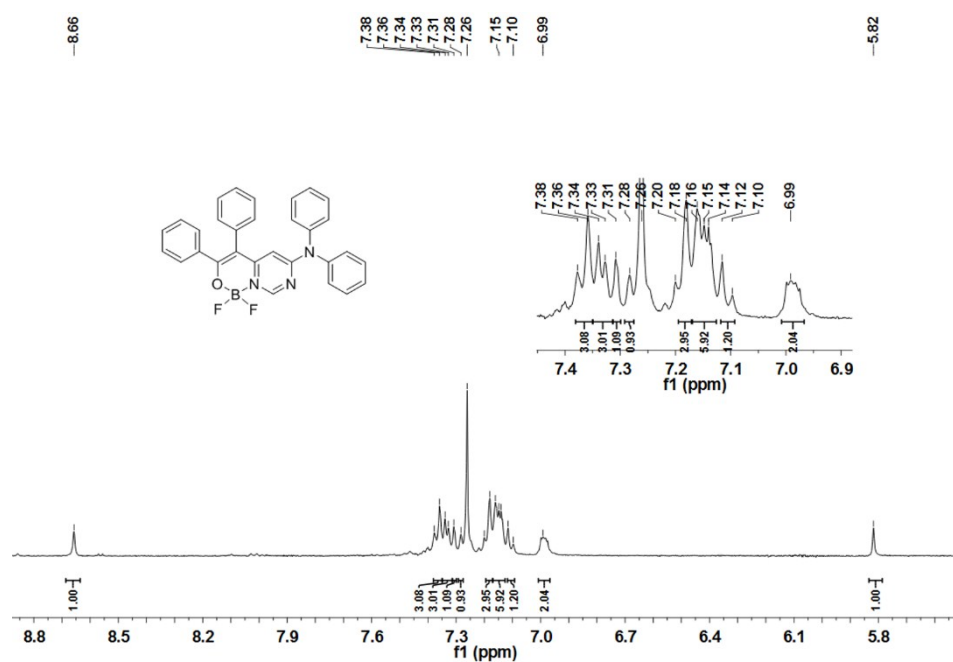

**Figure S10.**  $^1\text{H}$  NMR of **PB-4** in  $\text{CDCl}_3$ .

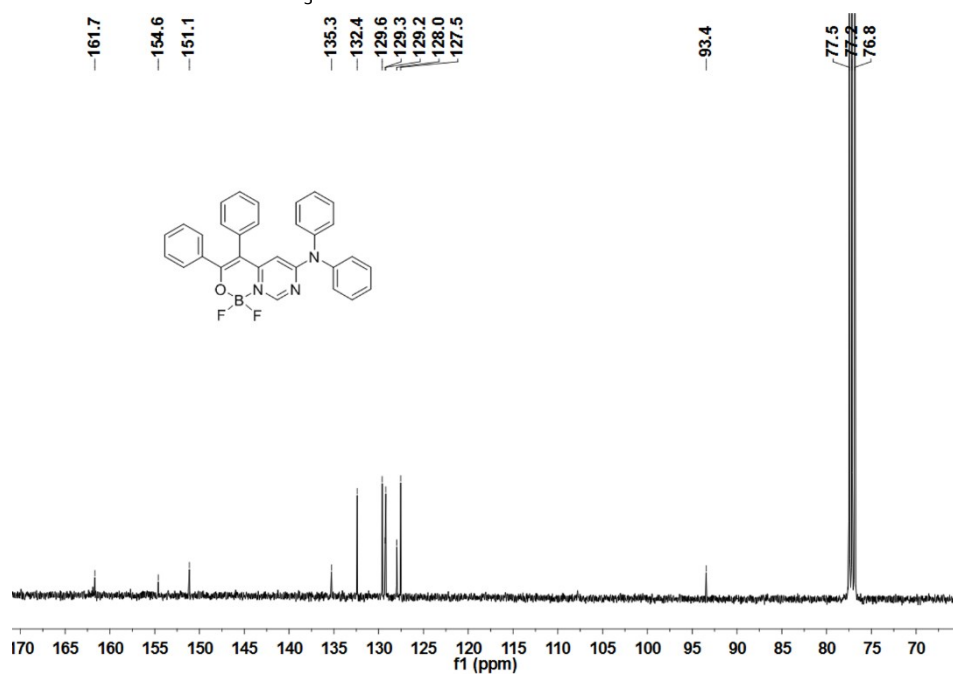

**Figure S11.**  $^{13}\text{C}$  NMR of **PB-4** in  $\text{CDCl}_3$ .

## Supporting Information

### Acquisition Parameter

|             |         |                       |           |                  |           |
|-------------|---------|-----------------------|-----------|------------------|-----------|
| Source Type | ESI     | Ion Polarity          | Positive  | Set Nebulizer    | 0.2 Bar   |
| Focus       | Active  | Set Capillary         | 4500 V    | Set Dry Heater   | 200 °C    |
| Scan Begin  | 50 m/z  | Set End Plate Offset  | -500 V    | Set Dry Gas      | 2.0 l/min |
| Scan End    | 550 m/z | Set Collision Cell RF | 120.0 Vpp | Set Divert Valve | Waste     |

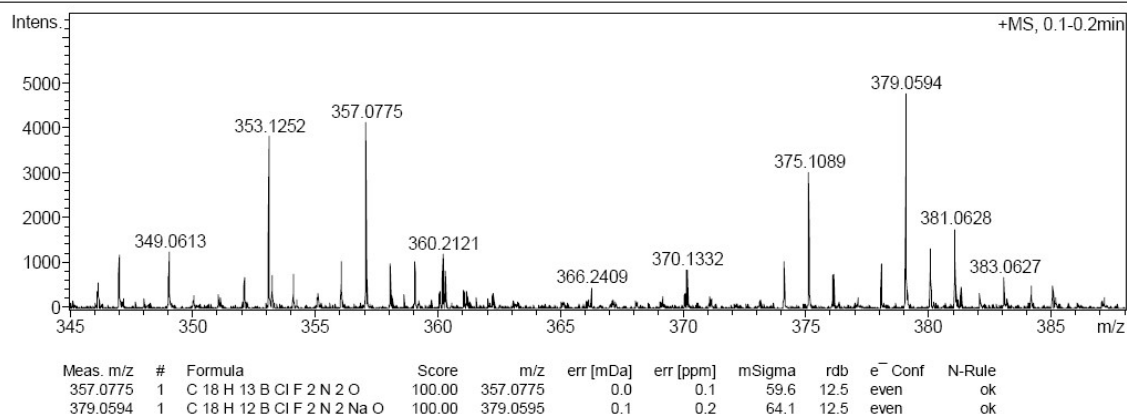

Figure S12. HRMS spectrum of PB-1.

### Acquisition Parameter

|             |         |                       |           |                  |           |
|-------------|---------|-----------------------|-----------|------------------|-----------|
| Source Type | ESI     | Ion Polarity          | Positive  | Set Nebulizer    | 0.2 Bar   |
| Focus       | Active  | Set Capillary         | 4500 V    | Set Dry Heater   | 200 °C    |
| Scan Begin  | 50 m/z  | Set End Plate Offset  | -500 V    | Set Dry Gas      | 2.0 l/min |
| Scan End    | 550 m/z | Set Collision Cell RF | 120.0 Vpp | Set Divert Valve | Waste     |

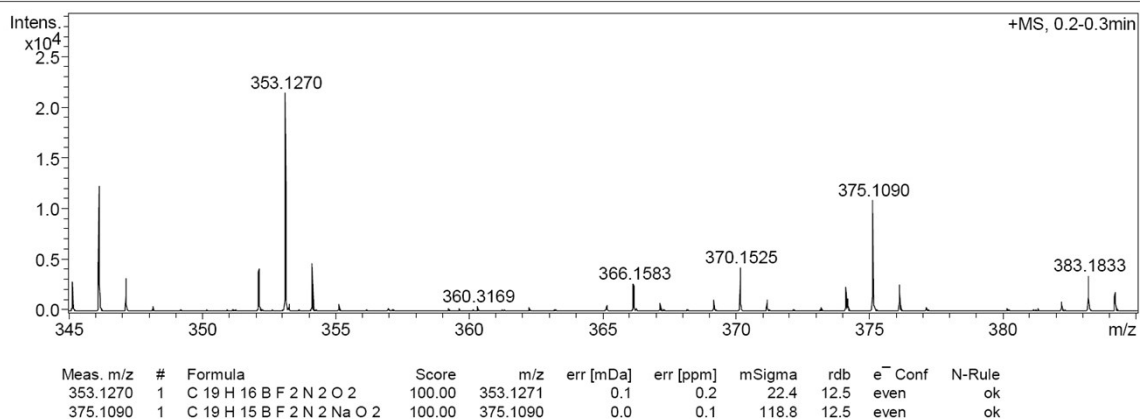

Figure S13. HRMS spectrum of PB-2.

### Acquisition Parameter

|             |         |                       |           |                  |           |
|-------------|---------|-----------------------|-----------|------------------|-----------|
| Source Type | ESI     | Ion Polarity          | Positive  | Set Nebulizer    | 0.2 Bar   |
| Focus       | Active  | Set Capillary         | 4500 V    | Set Dry Heater   | 200 °C    |
| Scan Begin  | 50 m/z  | Set End Plate Offset  | -500 V    | Set Dry Gas      | 2.0 l/min |
| Scan End    | 550 m/z | Set Collision Cell RF | 120.0 Vpp | Set Divert Valve | Waste     |

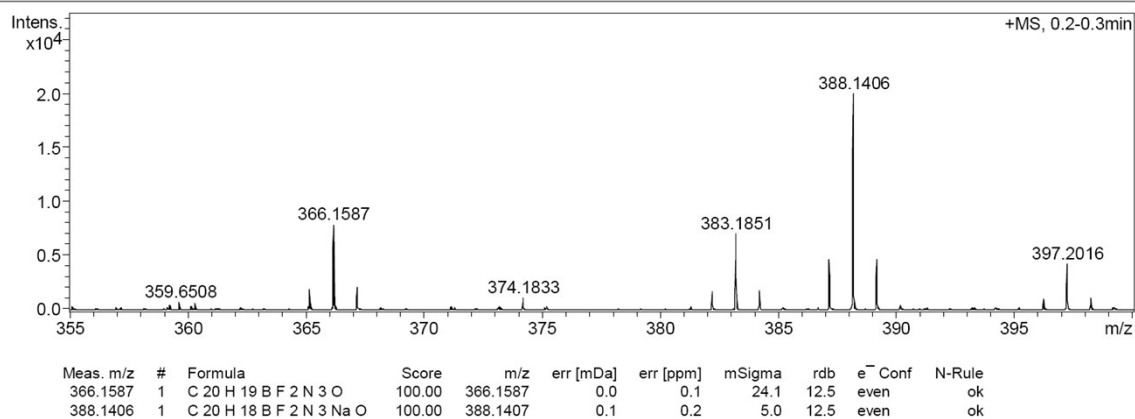

Figure S14. HRMS spectrum of PB-3.

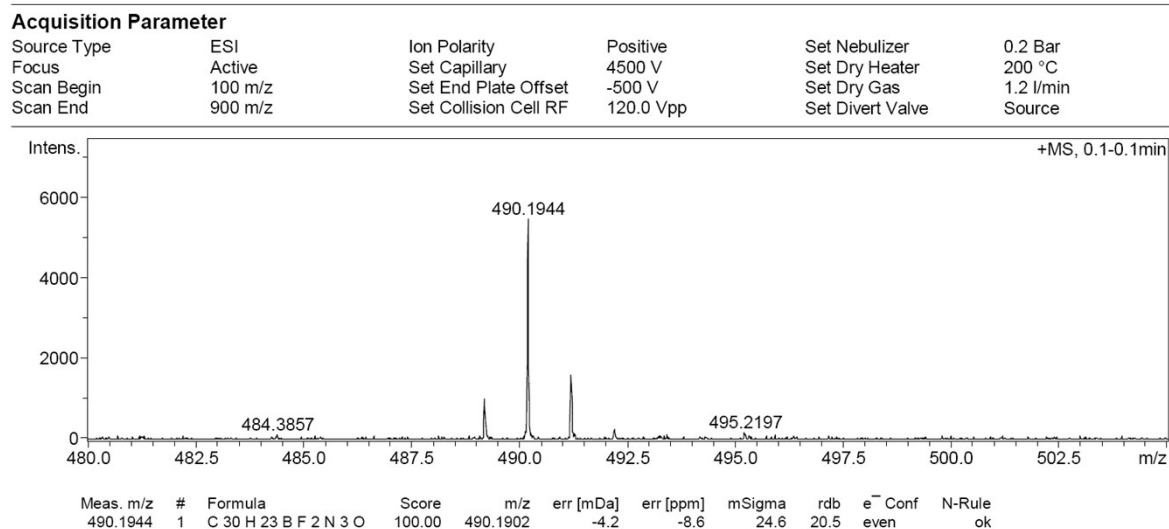

Figure S15. HRMS spectrum of PB-4.

Z-matrix and total energy of PB-1.

Symbolic Z-matrix:

Charge = 0 Multiplicity = 1

|    |          |          |          |
|----|----------|----------|----------|
| Cl | -4.88273 | 1.54284  | -0.25072 |
| C  | 2.47118  | -0.75318 | -0.00863 |
| O  | 0.63117  | -2.18568 | -0.00012 |
| C  | -2.31692 | 0.79208  | -0.09431 |
| H  | -2.09852 | 1.69417  | -0.14871 |
| C  | 0.08494  | 0.11321  | 0.02058  |
| C  | -3.61436 | 0.40028  | -0.1116  |
| C  | -1.31397 | -0.17269 | 0.00535  |
| N  | -4.00604 | -0.87712 | -0.0345  |
| C  | 4.50142  | 0.3024   | 0.70502  |
| H  | 4.9333   | 0.96229  | 1.1974   |
| N  | -1.72767 | -1.47949 | 0.07423  |
| F  | -0.85183 | -3.24892 | 1.40741  |
| C  | 3.23266  | -1.65623 | -0.73858 |
| H  | 2.80811  | -2.32726 | -1.22405 |
| F  | -1.01438 | -3.5732  | -0.80217 |
| C  | 4.60192  | -1.57351 | -0.75238 |
| H  | 5.09895  | -2.18148 | -1.25116 |
| B  | -0.69496 | -2.68341 | 0.16791  |
| C  | 1.05725  | 2.10019  | -1.14115 |
| H  | 1.15066  | 1.58286  | -1.90873 |
| C  | 5.24044  | -0.59239 | -0.03107 |
| H  | 6.16816  | -0.53553 | -0.04133 |
| C  | 1.33858  | 4.18926  | -0.03875 |
| H  | 1.62029  | 5.07479  | -0.05186 |



## Supporting Information

---

|   |          |          |          |
|---|----------|----------|----------|
| C | 3.12611  | 0.22965  | 0.71812  |
| H | 2.63499  | 0.84123  | 1.21609  |
| C | 0.998    | -0.90639 | 0.01404  |
| C | 0.4955   | 1.54749  | -0.00171 |
| C | -3.033   | -1.74205 | 0.05435  |
| H | -3.27711 | -2.63836 | 0.10909  |
| C | 0.34689  | 2.34574  | 1.10884  |
| H | -0.04796 | 1.9978   | 1.87603  |
| C | 1.47771  | 3.40958  | -1.14352 |
| H | 1.86292  | 3.76584  | -1.91106 |
| C | 0.77636  | 3.65824  | 1.09804  |
| H | 0.68563  | 4.1832   | 1.86088  |

**Total Energy, E(TD-HF/TD-KS) = -1562.0490885 Hartree**

Z-matrix and total energy of **PB-2**.

Symbolic Z-matrix:

Charge = 0 Multiplicity = 1

|   |          |          |          |
|---|----------|----------|----------|
| N | 1.69578  | -1.40092 | 0.13679  |
| O | 4.44842  | 1.47097  | -0.31226 |
| F | 1.04793  | -3.46311 | -0.85275 |
| O | -0.6387  | -2.16313 | 0.00247  |
| C | -0.59156 | 1.57591  | 0.02722  |
| N | 3.97187  | -0.74824 | 0.04351  |
| C | 1.25741  | -0.10335 | 0.05118  |
| C | -1.03622 | -0.89082 | 0.03418  |
| C | -2.5088  | -0.78092 | -0.00452 |
| F | 0.85406  | -3.26146 | 1.36496  |
| C | 3.54889  | 0.51288  | -0.11425 |
| C | -0.15756 | 0.1478   | 0.06884  |
| C | 2.22431  | 0.87594  | -0.07849 |
| H | 1.98123  | 1.77125  | -0.14147 |
| C | -3.23542 | -1.68949 | -0.76501 |
| H | -2.78745 | -2.34355 | -1.2509  |
| C | -1.1521  | 2.11133  | -1.11316 |
| H | -1.28235 | 1.57185  | -1.85995 |
| C | -0.41183 | 2.40347  | 1.12949  |
| H | -0.03821 | 2.0591   | 1.90857  |
| C | 3.0153   | -1.63671 | 0.14877  |
| H | 3.27926  | -2.5238  | 0.2424   |
| C | -3.21008 | 0.16561  | 0.74147  |
| H | -2.74549 | 0.77856  | 1.26414  |
| B | 0.70395  | -2.61726 | 0.17001  |
| C | -4.61274 | -1.6342  | -0.80679 |

## Supporting Information

---

|   |          |          |          |
|---|----------|----------|----------|
| H | -5.08721 | -2.23416 | -1.33646 |
| C | -1.33256 | 4.24531  | -0.06856 |
| H | -1.57772 | 5.14198  | -0.10675 |
| C | -5.28121 | -0.69188 | -0.0658  |
| H | -6.21024 | -0.65531 | -0.09029 |
| C | -4.58332 | 0.19783  | 0.71241  |
| H | -5.04171 | 0.82584  | 1.22111  |
| C | -0.7832  | 3.73605  | 1.07771  |
| H | -0.66108 | 4.2831   | 1.81991  |
| C | -1.52126 | 3.43931  | -1.15888 |
| H | -1.89969 | 3.78896  | -1.93373 |
| C | 5.84247  | 1.11742  | -0.31897 |
| H | 6.10501  | 0.83304  | 0.55976  |
| H | 6.3651   | 1.87999  | -0.57805 |
| H | 5.98822  | 0.40317  | -0.9429  |

**Total Energy, E(TD-HF/TD-KS) = -1216.9072323 Hartree**

Z-matrix and total energy of **PB-3**.

Symbolic Z-matrix:

Charge = 0 Multiplicity = 1

|   |          |          |          |
|---|----------|----------|----------|
| N | -1.29149 | -1.71432 | -0.07439 |
| O | 1.11166  | -2.156   | 0.05562  |
| C | -1.04682 | -0.36305 | 0.04787  |
| C | 1.32816  | -0.82829 | 0.02754  |
| C | 0.33288  | 0.07696  | 0.05855  |
| F | -0.24847 | -3.63588 | -1.0227  |
| F | -0.34873 | -3.50744 | 1.19196  |
| C | -3.43238 | -0.02222 | -0.0199  |
| C | 2.78881  | -0.54219 | -0.05756 |
| C | -2.12771 | 0.48245  | 0.10664  |
| H | -1.99457 | 1.39527  | 0.23127  |
| N | -3.63147 | -1.35742 | -0.21744 |
| C | 0.58318  | 1.54917  | 0.10583  |
| C | 0.2108   | 2.36375  | -0.95285 |
| H | -0.19495 | 1.99004  | -1.70097 |
| N | -4.51933 | 0.75284  | 0.01595  |
| C | -2.56686 | -2.1158  | -0.20721 |
| H | -2.70739 | -3.0294  | -0.30273 |
| C | -5.85694 | 0.21651  | -0.17969 |
| H | -5.80059 | -0.61956 | -0.6489  |
| H | -6.37782 | 0.83753  | -0.6938  |
| H | -6.2734  | 0.07709  | 0.67371  |
| C | 1.17522  | 2.13451  | 1.20054  |
| H | 1.43238  | 1.60503  | 1.92141  |

## Supporting Information

---

|   |          |          |          |
|---|----------|----------|----------|
| C | 3.67157  | -1.33758 | 0.65889  |
| H | 3.34019  | -2.00276 | 1.21804  |
| C | 0.43631  | 3.72072  | -0.90708 |
| H | 0.1926   | 4.25401  | -1.62876 |
| C | 5.02982  | -1.15377 | 0.55149  |
| H | 5.61196  | -1.68366 | 1.04528  |
| C | 3.30496  | 0.43914  | -0.88743 |
| H | 2.72651  | 0.98599  | -1.3678  |
| C | 4.66311  | 0.61376  | -1.0114  |
| H | 4.9985   | 1.2682   | -1.58113 |
| B | -0.17158 | -2.78149 | 0.04322  |
| C | -4.39583 | 2.17548  | 0.27469  |
| H | -3.88868 | 2.31094  | 1.07879  |
| H | -5.26956 | 2.55878  | 0.37871  |
| H | -3.94659 | 2.59716  | -0.46166 |
| C | 1.01559  | 4.28786  | 0.19365  |
| H | 1.15208  | 5.207    | 0.22673  |
| C | 5.52621  | -0.18204 | -0.29075 |
| H | 6.4451   | -0.06208 | -0.37201 |
| C | 1.39235  | 3.50194  | 1.24489  |
| H | 1.79508  | 3.88418  | 1.9904   |

**Total Energy, E(TD-HF/TD-KS) = -1236.282314 Hartree**

Z-matrix and total energy of **PB-4**.

Symbolic Z-matrix:

Charge = 0 Multiplicity = 1

|   |          |          |          |
|---|----------|----------|----------|
| N | -3.0398  | -0.13697 | 0.10264  |
| N | -1.90055 | -2.14772 | -0.0159  |
| N | 0.45815  | -2.18398 | -0.0169  |
| C | -1.84942 | -0.79538 | -0.00483 |
| O | 2.89245  | -2.26688 | 0.15976  |
| C | 1.82705  | -0.19044 | -0.14121 |
| C | -4.34899 | -0.7357  | -0.05187 |
| C | -2.98544 | 1.28719  | 0.33143  |
| C | 0.52426  | -0.82195 | -0.08753 |
| C | -0.64564 | -0.1299  | -0.08283 |
| H | -0.63203 | 0.79914  | -0.13405 |
| C | 1.83556  | 1.29503  | -0.30819 |
| C | -4.5973  | -1.68296 | -1.02313 |
| H | -3.90784 | -1.99498 | -1.56449 |
| C | -3.20216 | 2.14591  | -0.71492 |
| H | -3.42599 | 1.81521  | -1.55448 |
| F | 1.776    | -3.9302  | -0.82181 |

## Supporting Information

---

|   |          |          |          |
|---|----------|----------|----------|
| C | 2.94254  | -0.93782 | 0.00149  |
| C | -6.64646 | -0.73525 | 0.54614  |
| H | -7.34002 | -0.40427 | 1.0732   |
| C | -5.36851 | -0.27535 | 0.72509  |
| H | -5.19454 | 0.35674  | 1.38449  |
| C | -2.57075 | 3.12665  | 1.757    |
| H | -2.36173 | 3.46321  | 2.59822  |
| C | -6.9051  | -1.6854  | -0.41536 |
| H | -7.76954 | -2.00163 | -0.54463 |
| C | 6.58504  | -0.73003 | 0.82894  |
| H | 7.19366  | -1.18127 | 1.36738  |
| C | -0.74049 | -2.74895 | -0.00233 |
| H | -0.7569  | -3.67772 | 0.01752  |
| C | 2.04289  | 3.49021  | 0.62082  |
| H | 2.2233   | 4.03645  | 1.35125  |
| C | 4.35262  | -0.4487  | 0.01183  |
| C | 2.10346  | 2.1277   | 0.75759  |
| H | 2.32559  | 1.75964  | 1.58251  |
| C | -5.87467 | -2.16002 | -1.17928 |
| H | -6.04418 | -2.81693 | -1.81542 |
| C | 1.55112  | 1.86552  | -1.52214 |
| H | 1.39802  | 1.32314  | -2.26125 |
| C | 4.77919  | 0.61041  | -0.76173 |
| H | 4.17244  | 1.06655  | -1.29909 |
| C | -2.75722 | 3.9774   | 0.71078  |
| H | -2.65745 | 4.89433  | 0.83341  |
| C | -2.69226 | 1.77879  | 1.56891  |
| H | -2.57569 | 1.19919  | 2.2846   |
| B | 1.73258  | -3.03091 | 0.14989  |
| C | 5.27502  | -1.11849 | 0.80893  |
| H | 4.99719  | -1.83632 | 1.33266  |
| C | -3.08788 | 3.49104  | -0.51288 |
| H | -3.23544 | 4.07644  | -1.21862 |
| F | 1.64104  | -3.69744 | 1.33871  |
| C | 1.48627  | 3.22359  | -1.65443 |
| H | 1.28024  | 3.59728  | -2.48087 |
| C | 7.00033  | 0.32008  | 0.06063  |
| H | 7.89314  | 0.57924  | 0.07893  |
| C | 6.10898  | 0.99337  | -0.73698 |
| H | 6.39874  | 1.70641  | -1.26107 |
| C | 1.72042  | 4.04518  | -0.57587 |
| H | 1.66386  | 4.96879  | -0.66308 |

**Total Energy, E(TD-HF/TD-KS) = -1616.3977003 Hartree**
